# Supplementary material for: Job satisfaction among Community-Based Rehabilitation (CBR) workers in caring for disabled persons in the east coast region of Peninsular Malaysia
Source: Springer Nature journal article supplement (doi:10.1186/s12889-019-6520-z), 2019-02-19
Supplement: MOESM1 [file 16492650]

Participant ID:.....

CBR ID:.....

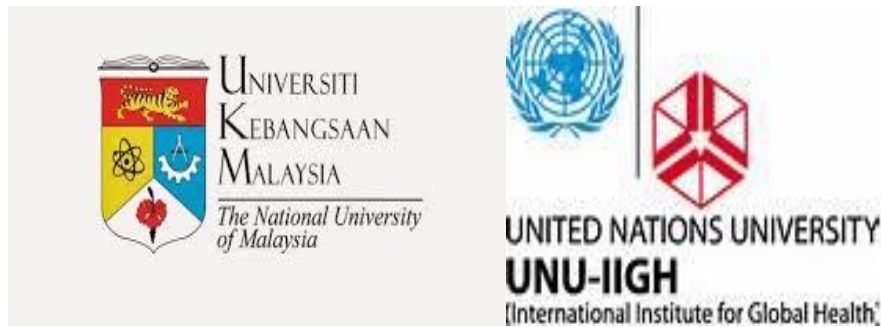

## FORM 3B

**Tajuk Kajian: Kajian Keberkesanan Kos Program Pemulihan dalam Komuniti (PDK) untuk Kanak-kanak Kurang Upaya di Malaysia: Perbandingan Antara Penjagaan di Pusat Pemulihan dengan Penjagaan di Rumah**

*Research Title: Cost-effectiveness of Community-Based Rehabilitation (CBR) Programme for Disabled Children in Malaysia: A Comparison Between Centre-based and Home-based Care*

### **Tinjauan Kepuasan Kakitangan**

*Staff Satisfaction Survey*

*Sekiranya ada sebarang soalan, sila hubungi:*

*If you have any concerns please contact:*

1. Haliza Hasan – 012 987 1404 ([hhaliza80@gmail.com](mailto:hhaliza80@gmail.com))
2. Prof. Dato'. Dr. Syed Mohamed Aljunid Syed Junid – 012 638 3521([saljunid@gmail.com](mailto:saljunid@gmail.com))

**Kami berminat untuk mengetahui bagaimana anda berpuas hati dengan Program Pemulihan Dalam Komuniti (PDK) sebagai pelatih dan kakitangan Jabatan Kebajikan Masyarakat, Malaysia.**

*We are interested in knowing how you are satisfied with Community-Based Rehabilitation (CBR) programme as a trainer and staff of Department of Social Welfare, Malaysia.*

**Sila jawab soalan-soalan berdasarkan pengalaman anda dengan program PDK dengan menanda (√) di kotak yang disediakan**

*Please answers the questions based on your experience with CBR programme by marks (√) in the boxes provided*

**1. Bagaimana anda memohon kerja anda di jabatan ini?**

*How did you apply your job in this department?*

Kawan  
*Friend*

Surat khabar  
*News paper*

Laman web  
*Website*

Lain-lain, sila nyatakan.....  
*Others, please indicate.....*

**2. Adakah ini pengalaman pertama anda bekerja dengan terapi di PDK?**

*Was this your first experience working with CBR therapy?*

Ya  
*Yes*

Tidak  
*No*

**3. Sila tandakan jenis kelainan upaya yang ditugaskan kepada anda untuk anda melakukan terapi di PDK (Anda boleh tanda lebih daripada satu).**

*Please tick which of the disabilities that you are assigned for therapy in CBR programme (You may tick more than one)*

Kurang upaya penglihatan  
*Visually impaired*

Kurang upaya pendengaran  
*Hearing impaired*

Kurang upaya fizikal  
*Physically disabled*

Kurang upaya pembelajaran  
*Learning disabilities*

Kurang upaya pertuturan  
*Speech disabilities*

Mental  
*Mental*

Kurang upaya pelbagai  
*Multiple disabilities*

- Sila baca kenyataan yang diberikan**  
Please read the statement given
- Gunakan skala yang diberikan bagi menyatakan tahap kepuasan anda pada setiap pernyataan berikut**  
Use the scale given to rate your degree of satisfaction with each of the following statements
- Sila tandakan (√) dalam petak berkenaan**  
Kindly please (√) appropriate respond.

### Skala Tahap Puas Hati

#### Degree of Satisfaction

|                                                            |                                            |                                  |                                   |                                                   |                                                      |
|------------------------------------------------------------|--------------------------------------------|----------------------------------|-----------------------------------|---------------------------------------------------|------------------------------------------------------|
| <b>1</b>                                                   | <b>2</b>                                   | <b>3</b>                         | <b>4</b>                          | <b>5</b>                                          | <b>0</b>                                             |
| <b>Sangat tidak setuju</b><br><i>Strongly dissatisfied</i> | <b>Tidak setuju</b><br><i>Dissatisfied</i> | <b>Neutral</b><br><i>Neutral</i> | <b>Setuju</b><br><i>Satisfied</i> | <b>Sangat setuju</b><br><i>Strongly satisfied</i> | <b>Tidak mempunyai pendapat</b><br><i>No opinion</i> |

| Bil. No.                                                                                | Item<br><i>Item</i>                                                                                                                                     | Skala<br><i>Scale</i> |   |   |   |   |   |
|-----------------------------------------------------------------------------------------|---------------------------------------------------------------------------------------------------------------------------------------------------------|-----------------------|---|---|---|---|---|
|                                                                                         |                                                                                                                                                         | 1                     | 2 | 3 | 4 | 5 | 0 |
| <b>A. Akses</b><br><i>Access</i>                                                        |                                                                                                                                                         |                       |   |   |   |   |   |
| 1.                                                                                      | <b>Pusat PDK dijadualkan pada waktu yang sesuai.</b><br><i>The CBR Centre scheduled at convenient times.</i>                                            |                       |   |   |   |   |   |
| 2.                                                                                      | <b>Lokasi pusat PDK adalah mudah untuk saya.</b><br><i>The location of the CBR centre is convenient for me.</i>                                         |                       |   |   |   |   |   |
| <b>B. Pengurusan Pentadbiran Teknikal</b><br><i>Administrative Technical management</i> |                                                                                                                                                         |                       |   |   |   |   |   |
| 3.                                                                                      | <b>Menyediakan perkhidmatan pemulihan seperti yang dijanjikan.</b><br><i>Providing rehabilitation services as promised.</i>                             |                       |   |   |   |   |   |
| 4.                                                                                      | <b>Gaji untuk pekerja PDK adalah berpatutan.</b><br><i>The salary for CBR staff was acceptable.</i>                                                     |                       |   |   |   |   |   |
| <b>C. Pengurusan Klinikal</b><br><i>Clinical Management</i>                             |                                                                                                                                                         |                       |   |   |   |   |   |
| 5.                                                                                      | <b>Sentiasa memaklumkan tentang perkhidmatan PDK kepada pelatih dan keluarga.</b><br><i>Keeping trainee or/ and family informed about CBR services.</i> |                       |   |   |   |   |   |
| 6.                                                                                      | <b>Pekerjaan saya banyak menggunakan kemahiran dan kebolehan saya.</b><br><i>My job makes good use of my skills and abilities.</i>                      |                       |   |   |   |   |   |
| <b>D. Pengurusan Interpersonal</b><br><i>Interpersonal Management</i>                   |                                                                                                                                                         |                       |   |   |   |   |   |
| 7.                                                                                      | <b>Sentiasa menghormati pelatih semasa program PDK dijalankan.</b><br><i>Always respect trainee during CBR programme.</i>                               |                       |   |   |   |   |   |

|                                                             |                                                                                                                                                                                                                                                                            |  |  |  |  |  |  |
|-------------------------------------------------------------|----------------------------------------------------------------------------------------------------------------------------------------------------------------------------------------------------------------------------------------------------------------------------|--|--|--|--|--|--|
| 8.                                                          | <b>Memberi perhatian individu kepada pelatih.</b><br><i>Giving trainees individual attention.</i>                                                                                                                                                                          |  |  |  |  |  |  |
| 9.                                                          | <b>Saya menepati masa dalam menjalankan program PDK.</b><br><i>I am punctually conducting the CBR programme.</i>                                                                                                                                                           |  |  |  |  |  |  |
| 10.                                                         | <b>Program PDK merupakan pekerjaan yang bermakna kepada saya.</b><br><i>CBR programme is meaningful work to me.</i>                                                                                                                                                        |  |  |  |  |  |  |
| 11.                                                         | <b>Program PDK adalah tugas mencabar.</b><br><i>CBR programme is a challenging job.</i>                                                                                                                                                                                    |  |  |  |  |  |  |
| 12.                                                         | <b>Saya sering berasa stres di tempat kerja.</b><br><i>I often feel stressful at work.</i>                                                                                                                                                                                 |  |  |  |  |  |  |
| 13.                                                         | <b>Terdapat banyak peluang kepada saya semasa bekerja di dalam program PDK.</b><br><i>There are an opportunities for me while working in CBR programme.</i>                                                                                                                |  |  |  |  |  |  |
| 14.                                                         | <b>Saya bangga menjadi salah seorang petugas PDK.</b><br><i>I am proud of being one of the CBR trainers.</i>                                                                                                                                                               |  |  |  |  |  |  |
| 15.                                                         | <b>Saya memahami masalah dan keadaan.pelatih saya.</b><br><i>I understood my trainee's problem and condition.</i>                                                                                                                                                          |  |  |  |  |  |  |
| 16.                                                         | <b>Saya memahami bahawa sangat penting bagi saya untuk mengenali dan menghormati nilai perbezaan kaum, jantina, umur, dan lain-lain.</b><br><i>I understand why it is so important for me to recognise and respect the value of differences in race, gender, age, etc.</i> |  |  |  |  |  |  |
| 17.                                                         | <b>Pekerjaan saya memberi perbezaan dalam kehidupan orang lain.</b><br><i>My job makes a difference in the lives of others.</i>                                                                                                                                            |  |  |  |  |  |  |
| <b>E. Penjagaan Berterusan</b><br><i>Continuity of Care</i> |                                                                                                                                                                                                                                                                            |  |  |  |  |  |  |
| 18.                                                         | <b>Saya berpuas hati dengan manfaat pekerjaan yang diperolehi .</b><br><i>I am satisfied with my employment benefits.</i>                                                                                                                                                  |  |  |  |  |  |  |
| 19.                                                         | <b>Saya berasa digalakkan untuk menghasilkan cara baru yang lebih baik untuk menjalankan program PDK.</b><br><i>I feel encouraged to come up with new and better ways of doing CBR programme.</i>                                                                          |  |  |  |  |  |  |
| 20.                                                         | <b>Secara keseluruhan, saya berpuas hati dengan tugas saya sebagai petugas PDK.</b><br><i>Overall, I am satisfied with my job as a CBR trainer.</i>                                                                                                                        |  |  |  |  |  |  |

**- TERIMA KASIH -**  
**- THANK YOU -**
